# Supplementary material
Source: MDPI journal article supplement (https://www.mdpi.com/2073-445X/12/2/514)

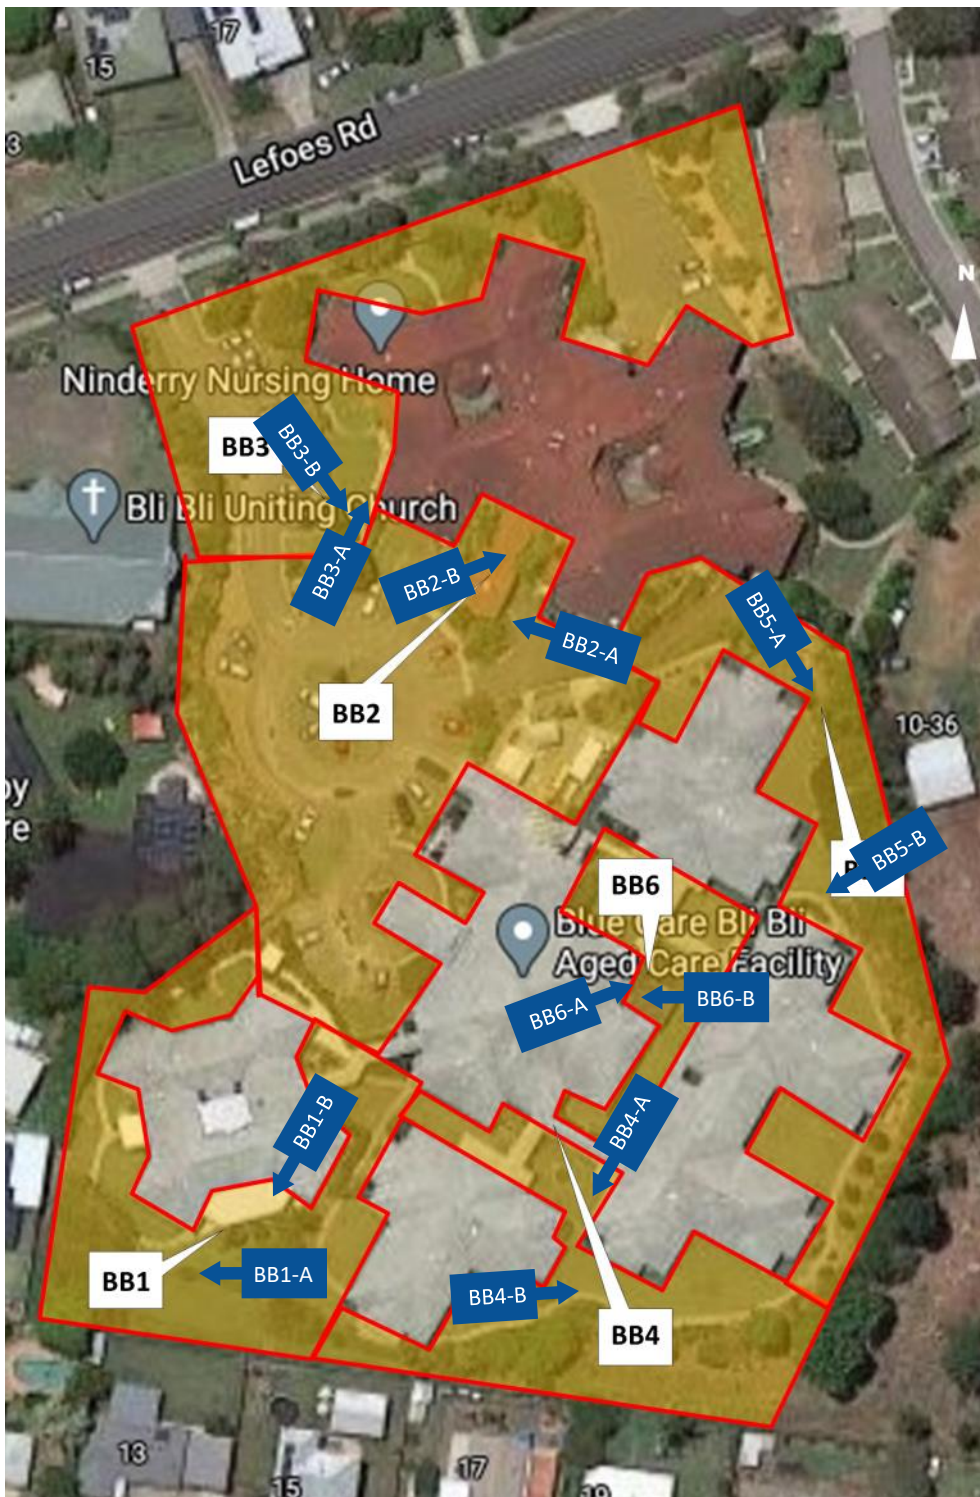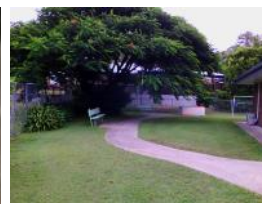

BB1-A

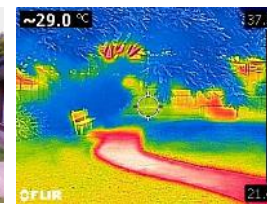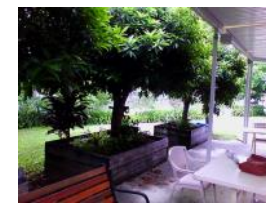

BB1-B

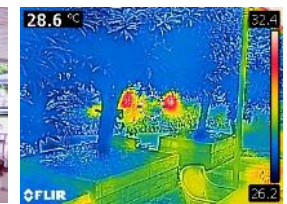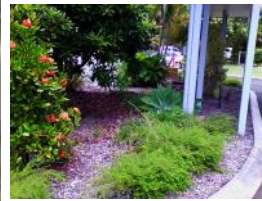

BB2-A

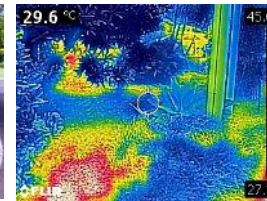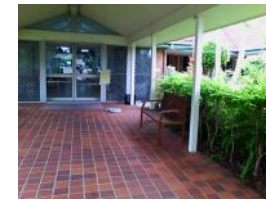

BB2-B

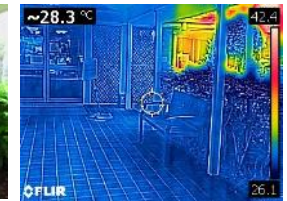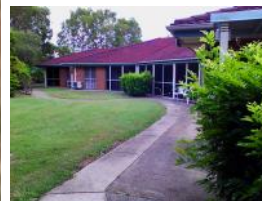

BB3-A

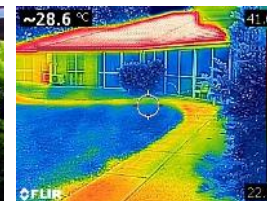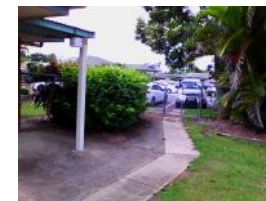

BB3-B

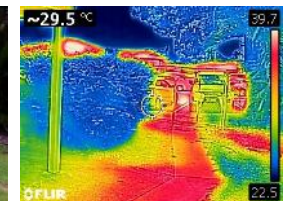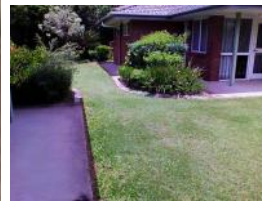

BB4-A

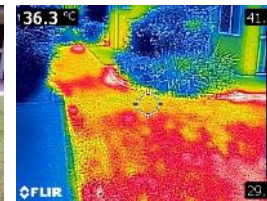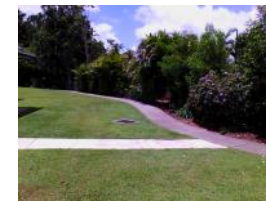

BB4-B

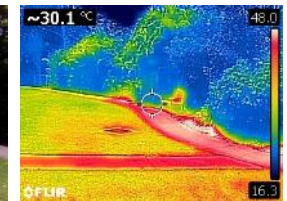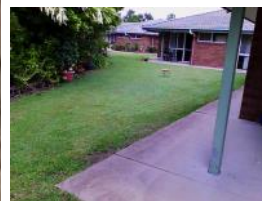

BB5-A

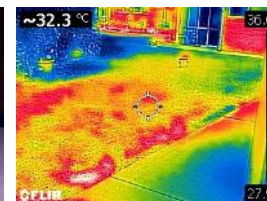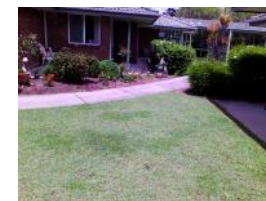

BB5-B

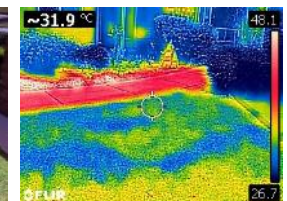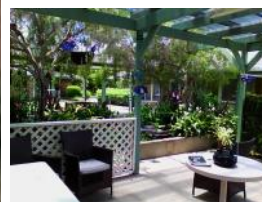

BB6-A

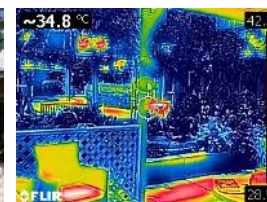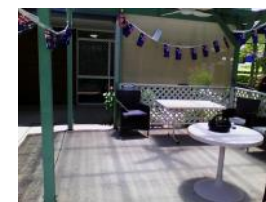

BB6-B

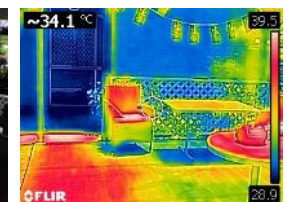



Case Study Site - Thermal Images: CALOUNDRA

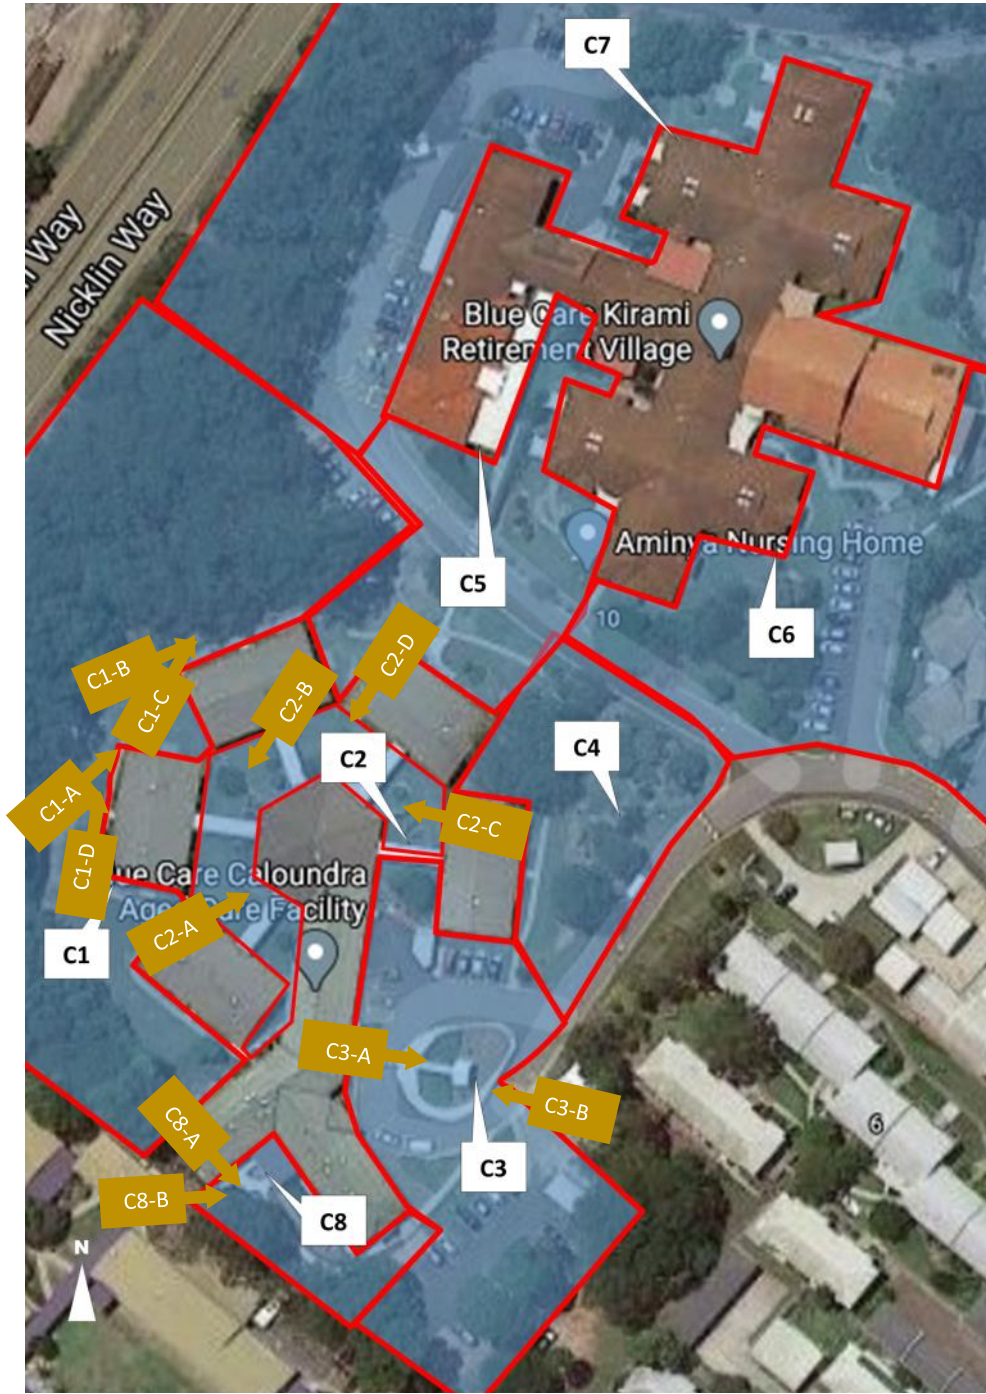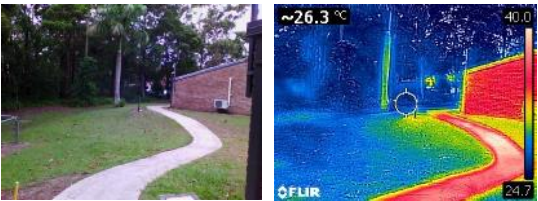

C1-A

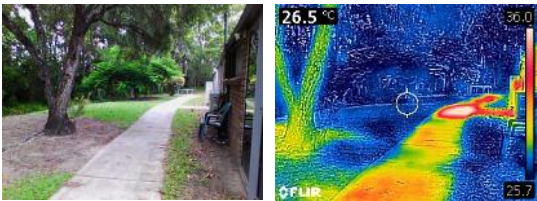

C1-B

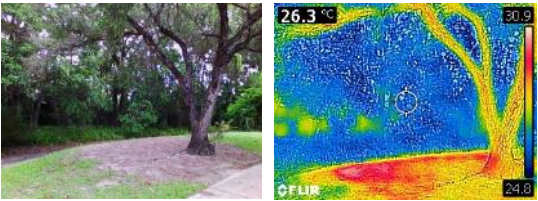

C1-C

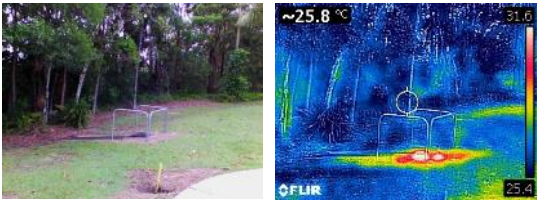

C1-D

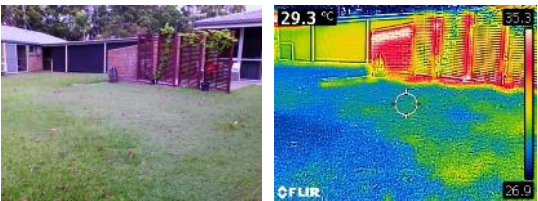

C2-A

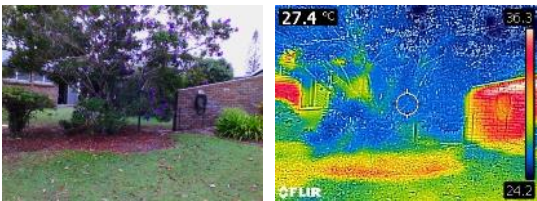

C2-B

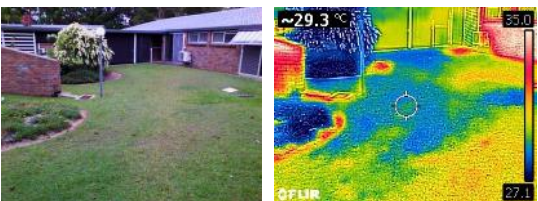

C2-C

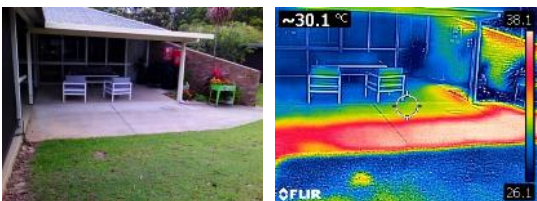

C2-D

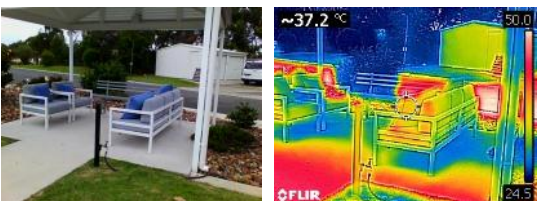

C3-A

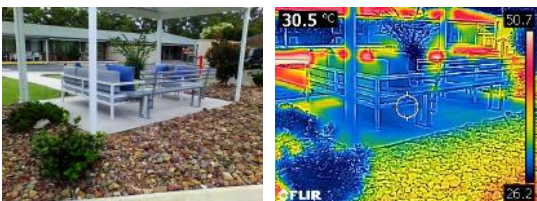

C3-B

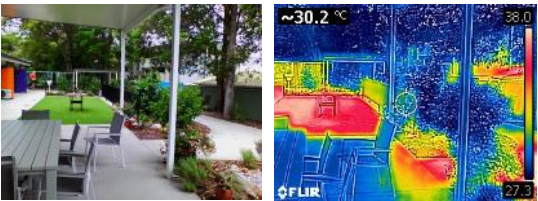

C8-A

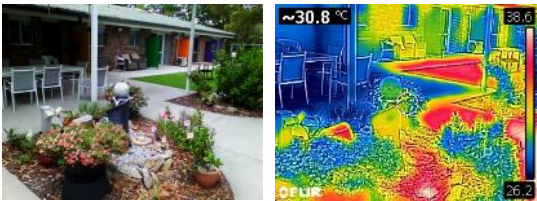

C8-B



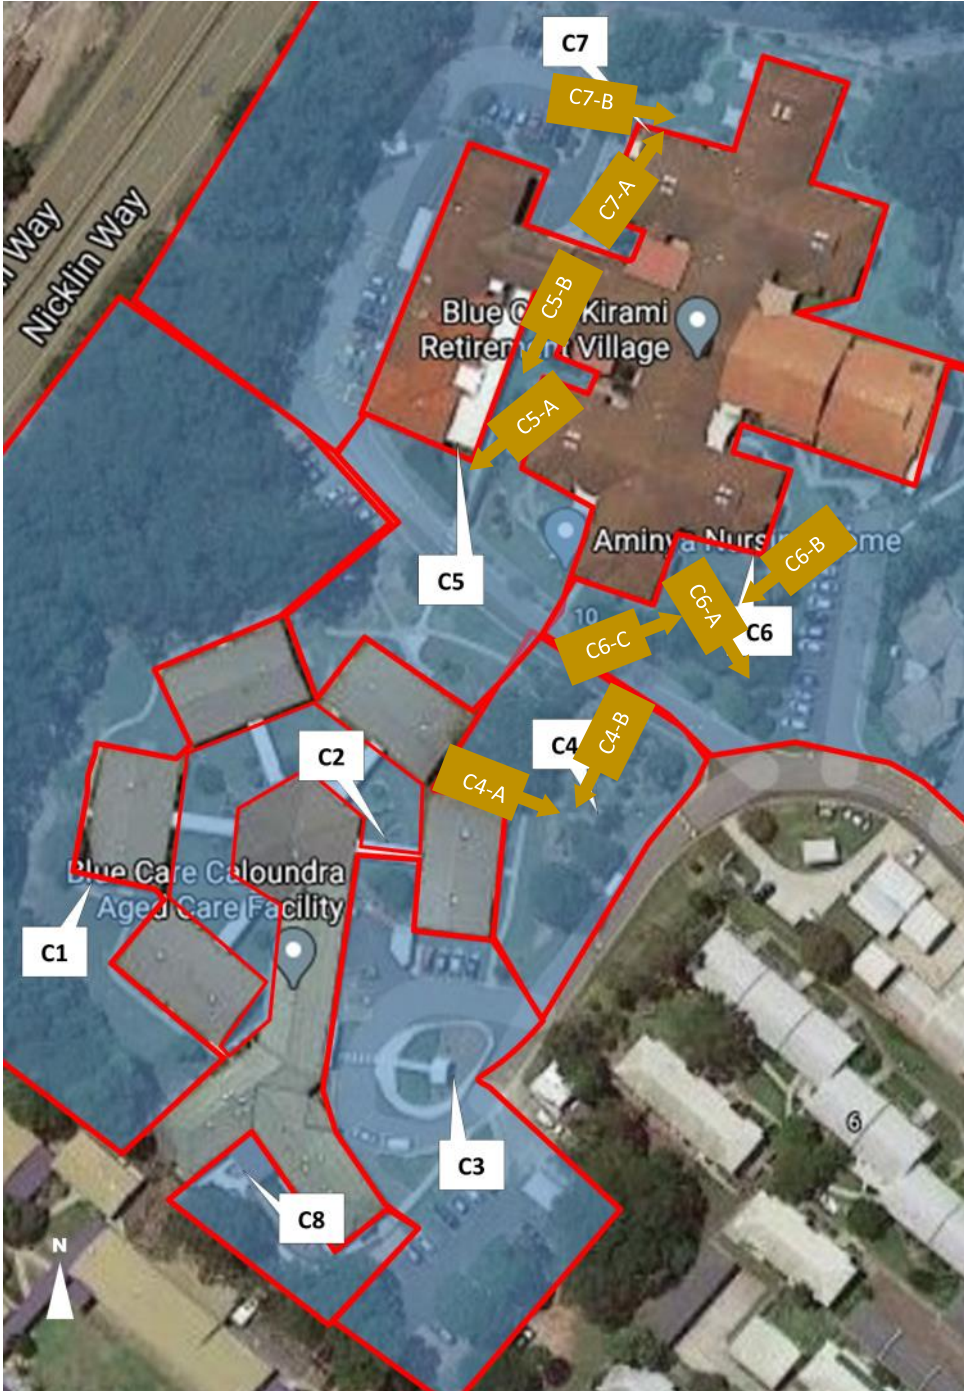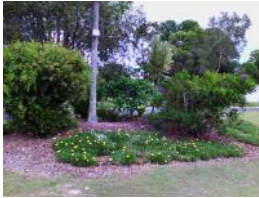

C4-A

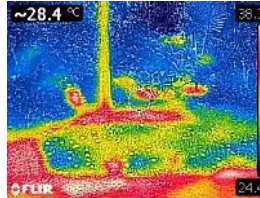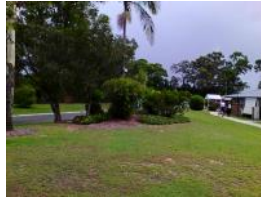

C4-B

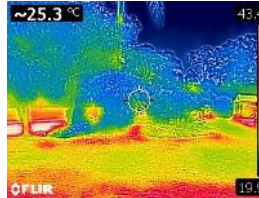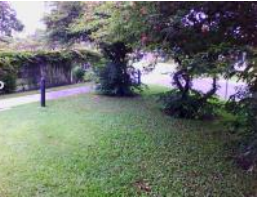

C5-A

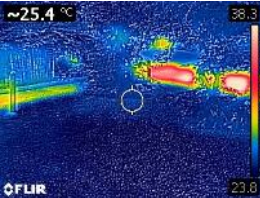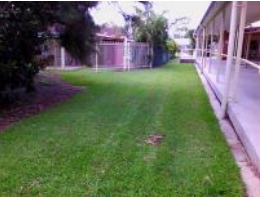

C5-B

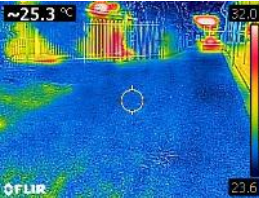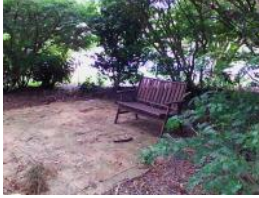

C6-A

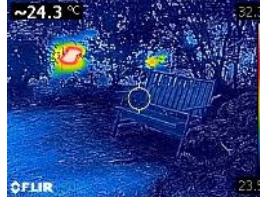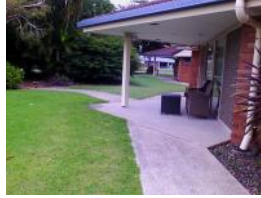

C6-B

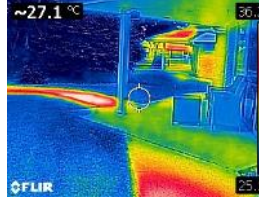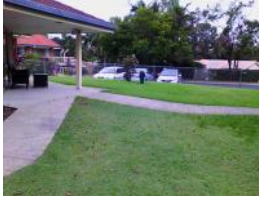

C6-C

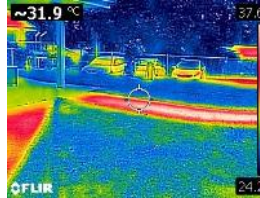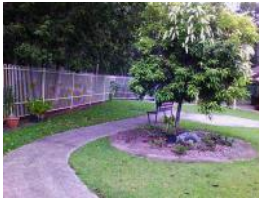

C7-A

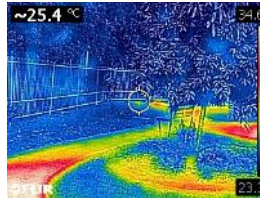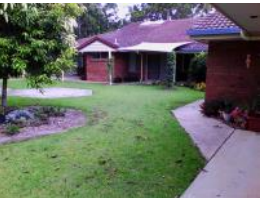

C7-B

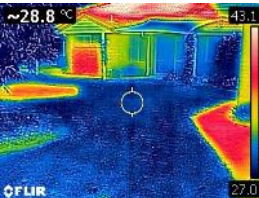

Supplement: s1 [file s1]
