# Supplementary material
Source: MDPI journal article supplement (https://www.mdpi.com/2073-445X/12/2/514)
Supplement: s1 [file s1]

Archive with 2 entries (2 files):
- SUP MATERIALS - Completed Audits Bli Bli + Caloundra.pdf
- SUP MATERIALS - SITE PHOTOS.pdf
